# Supplementary material for: Exploring the Utility of Diffusing Wave Spectroscopy (DWS) as a Novel Tool for Early Detection of Stability Issues in Cosmetic Emulsions
Source: MDPI journal article supplement (doi:10.3390/cosmetics8040099), 2021-10-28
Supplement: s1 [file s1]

Article

# Exploring the Utility of Diffusing Wave Spectroscopy (DWS) as a Novel Tool for Early Detection of Stability Issues in Cosmetic Emulsions

Mackenzie Kolman, Gregory Boland and Samiul Amin \*

Department of Chemical Engineering, Manhattan College, New York, NY 10471, USA; mkolman01@manhattan.edu (M.K.); gboland01@manhattan.edu (G.B.)

\* Correspondence: samin01@manhattan.edu

## Supplementary Materials:

**Table S1.** List of symbols and acronyms throughout the text in order of appearance.

| Symbols/Acronyms                   | Meaning                             |
|------------------------------------|-------------------------------------|
| DWS                                | Diffusing Wave Spectroscopy         |
| MSD                                | Mean Square Displacement            |
| CAPB                               | Cocamidopropyl Betaine              |
| SLES                               | Sodium Lauryl Ether Sulfate         |
| DLS                                | Dynamic Light Scattering            |
| $g_1(\tau)$                        | Intensity Auto Correlation Function |
| $s$                                | Path Length                         |
| $l^*$                              | Transport Free Mean Path            |
| $l_a$                              | Absorption Length                   |
| $D$                                | Diffusion Coefficient               |
| SDS                                | Sodium Dodecyl Sulfate              |
| $\langle \Delta r^2(\tau) \rangle$ | Mean Square Displacement            |
| $L$                                | Path Length, Cuvette Size           |

**Citation:** Kolman, M.; Boland, G.; Amin, S. Exploring the Utility of Diffusing Wave Spectroscopy (DWS) as a Novel Tool for Early Detection of Stability Issues in Cosmetic Emulsions. *Cosmetics* **2021**, *8*, 99. <https://doi.org/10.3390/cosmetics8040099>

Academic Editor: Enzo Berardesca

Received: 21 August 2021

Accepted: 25 October 2021

Published: 28 October 2021

**Publisher's Note:** MDPI stays neutral with regard to jurisdictional claims in published maps and institutional affiliations.

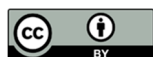

**Copyright:** © 2021 by the authors. Submitted for possible open access publication under the terms and conditions of the Creative Commons Attribution (CC BY) license (<https://creativecommons.org/licenses/by/4.0/>).
